# Supplementary material for: A Cyclic Altered Peptide Analogue Based on Myelin Basic Protein 87–99 Provides Lasting Prophylactic and Therapeutic Protection Against Acute Experimental Autoimmune Encephalomyelitis
Source: PubMed Central journal article supplement (PMC6017753; doi:10.3390/molecules23020304), 2018-01-31
Supplement: molecules-23-00304-s001.pdf [file molecules-23-00304-s001.pdf]

## Supplementary Material

### **A cyclic altered peptide analogue based on myelin basic protein 87-99 provides lasting prophylactic and therapeutic protection against acute experimental autoimmune encephalomyelitis**

Mary Emmanouil<sup>1</sup>, Vivian Tseveleki<sup>2</sup>, Iro Triantafyllakou<sup>3</sup>, Agathi Nteli<sup>4</sup>, Theodore Tselios<sup>5,\*</sup> and Lesley Probert<sup>6,\*</sup>

<sup>1</sup>Laboratory of Molecular Genetics, Hellenic Pasteur Institute, 11521 Athens, Greece; emmanouilm@pasteur.gr

<sup>2</sup>Laboratory of Molecular Genetics, Hellenic Pasteur Institute, 11521 Athens, Greece; tseveleki@gmail.com

<sup>3</sup>Department of Chemistry, University of Patras, 26504 Patras, Greece; irotriant@gmail.com

<sup>4</sup>Department of Chemistry, University of Patras, 26504 Patras, Greece; anteli@upatras.gr

<sup>5</sup>Department of Chemistry, University of Patras, 26504 Patras, Greece; tselios@upatras.gr

<sup>6</sup>Laboratory of Molecular Genetics, Hellenic Pasteur Institute, 11521 Athens, Greece; lesley.probert@gmail.com

\*Correspondence: tselios@upatras.gr; Tel.: +30-2610997905 and lesley.probert@gmail.com; Tel: +30-2106478866

## Table of contents

|                                                         |              |
|---------------------------------------------------------|--------------|
| <b>ESI MS data</b>                                      | <b>S1-S2</b> |
| cyclo(91-99)[Ala <sup>96</sup> ]MBP <sub>87-99</sub>    | S1           |
| cyclo(87-99)[Ala <sup>91,96</sup> ]MBP <sub>87-99</sub> | S2           |

**cyclo(91-99)[Ala<sup>96</sup>]MBP<sub>87-99</sub>**

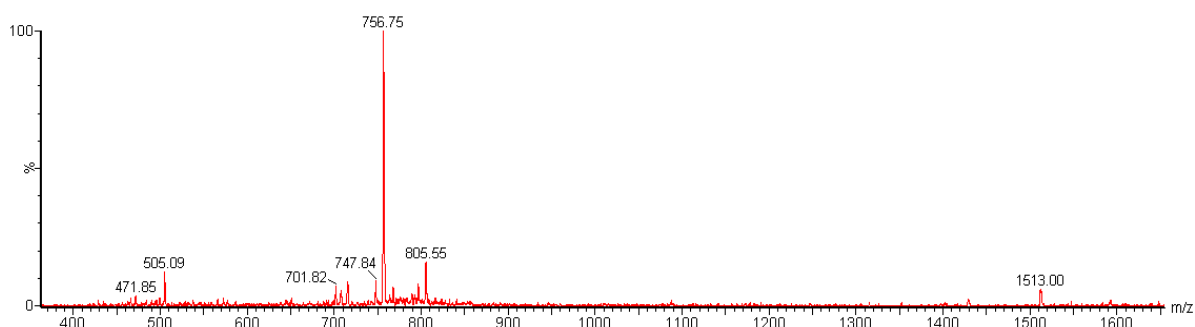

**Figure S1:** Electrospray ionization mass spectrometry (ESI-MS) spectrum of synthesized analogue cyclo(91-99)[Ala<sup>96</sup>]MBP<sub>87-99</sub>.  $M_{theoretical}$ : 1511.77;  $(M+2H^+)/2_{theoretical}$ : 756.89. The ESI-MS experiment was performed on a Micromass ZQ Electrospray Platform coupled with a MassLynx 4.1 data system.

**cyclo(87-99)[Ala<sup>91,96</sup>]MBP<sub>87-99</sub>**

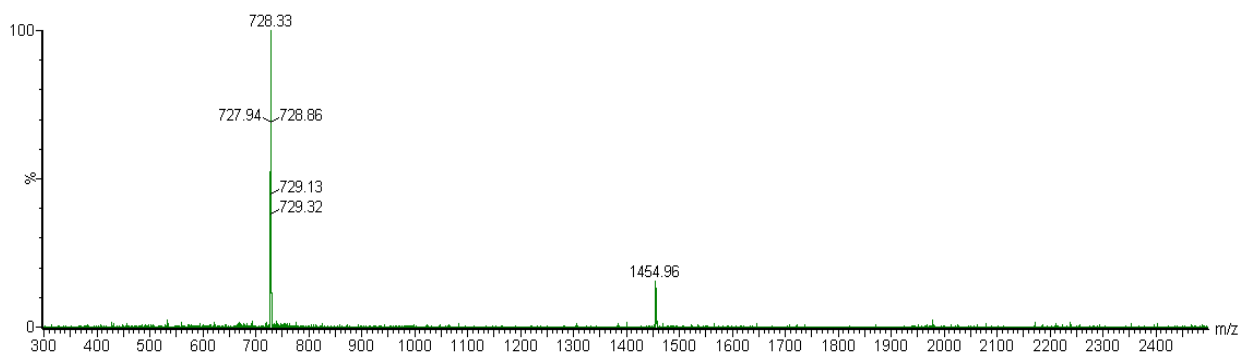

**Figure S2:** Electrospray ionization mass spectrometry (ESI-MS) spectrum of synthesized analogue cyclo(87-99)[Ala<sup>91,96</sup>]MBP<sub>87-99</sub>.  $M_{theoretical}$ : 1454.67;  $(M+2H^+)/2_{theoretical}$ : 728.36. The ESI-MS experiment was performed on a Micromass ZQ Electrospray Platform coupled with a MassLynx 4.1 data system.
